# Supplementary material for: The Effect of High Polyphenol Extra Virgin Olive Oil on Blood Pressure and Arterial Stiffness in Healthy Australian Adults: A Randomized, Controlled, Cross-Over Study
Source: PubMed Central journal article supplement (PMC7468912; doi:10.3390/nu12082272), 2020-07-29
Supplement: nutrients-12-02272-s001.pdf [file nutrients-12-02272-s001.pdf]

**Table S1.** Summary of olive oil volume returned by participants following the two diet interventions.

---

|                                          | <b>Low polyphenol OO</b> | <b>High Polyphenol OO</b> |                 |
|------------------------------------------|--------------------------|---------------------------|-----------------|
| <b>1<sup>st</sup> intervention</b>       | <b>Mean (SD)</b>         | <b>Mean (SD)</b>          | <b>*P-value</b> |
| Actual remaining OO (ml)                 | 106.4 (152.2)            | 100.4 (123.6)             | 0.888           |
| Compliance based on actual remaining (%) | 92                       | 92                        |                 |
| <b>2<sup>nd</sup> Intervention</b>       |                          |                           |                 |
| Actual remaining OO (ml)                 | 105.9 (133.2)            | 123.1 (164.7)             | 0.708           |
| Compliance based on actual remaining (%) | 92                       | 90                        |                 |

---

\*P-values derived from the non-parametric Mann-Whitney test. OO, olive oil; SD, Standard Deviation.
